# Supplementary figures and images for: Evidence for a DNA-relay mechanism in ParABS-mediated chromosome segregation
Source: eLife journal article supplement (doi:10.7554/elife.02758), 2014-05-23

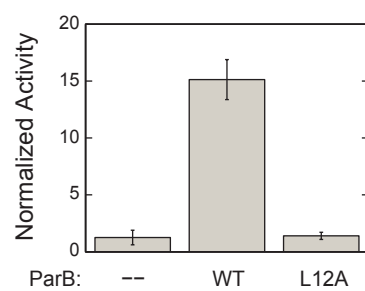

**Figure 1—figure supplement 2**

Supplement: supp [file elife-02758-supp-v1.zip]

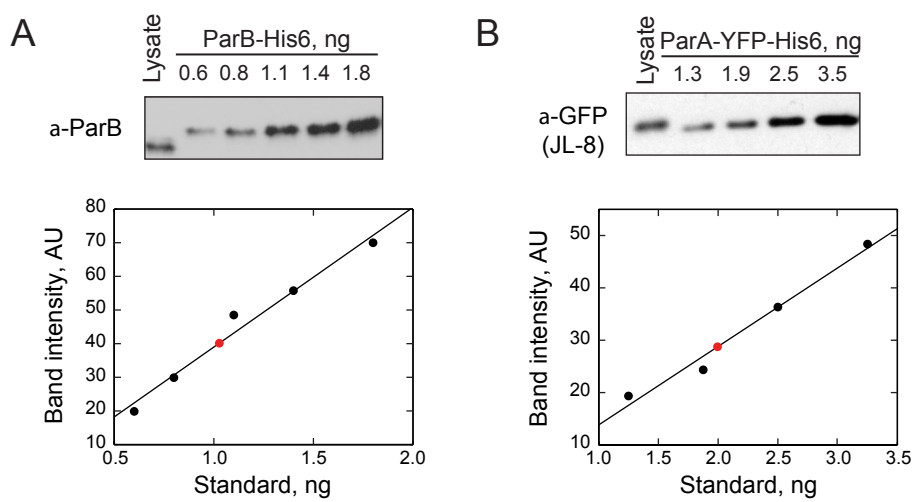

**Figure 1—figure supplement 4**

Supplement: supp [file elife-02758-supp-v1.zip]

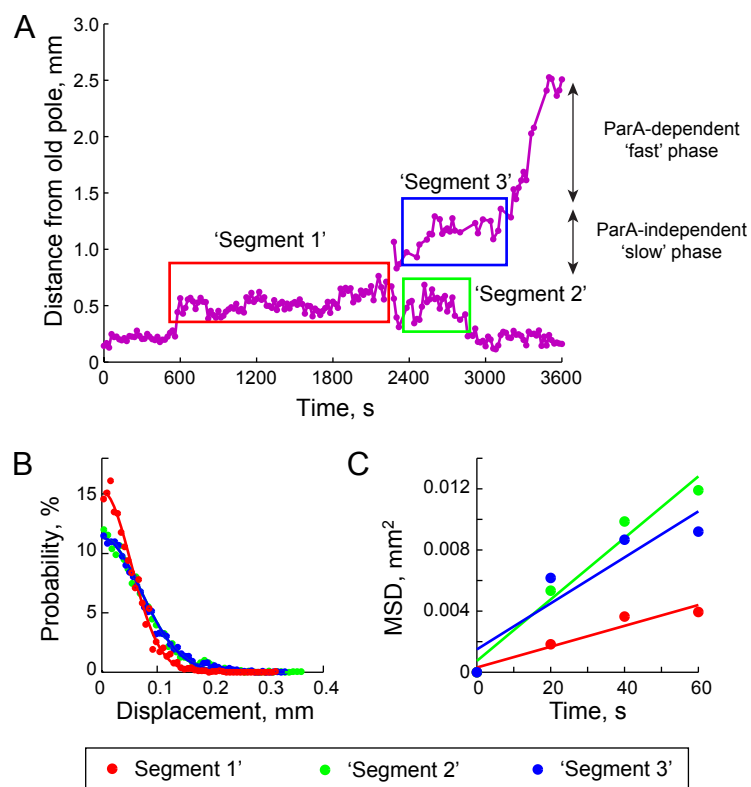

**Figure 4—figure supplement 2**

Supplement: supp [file elife-02758-supp-v1.zip]

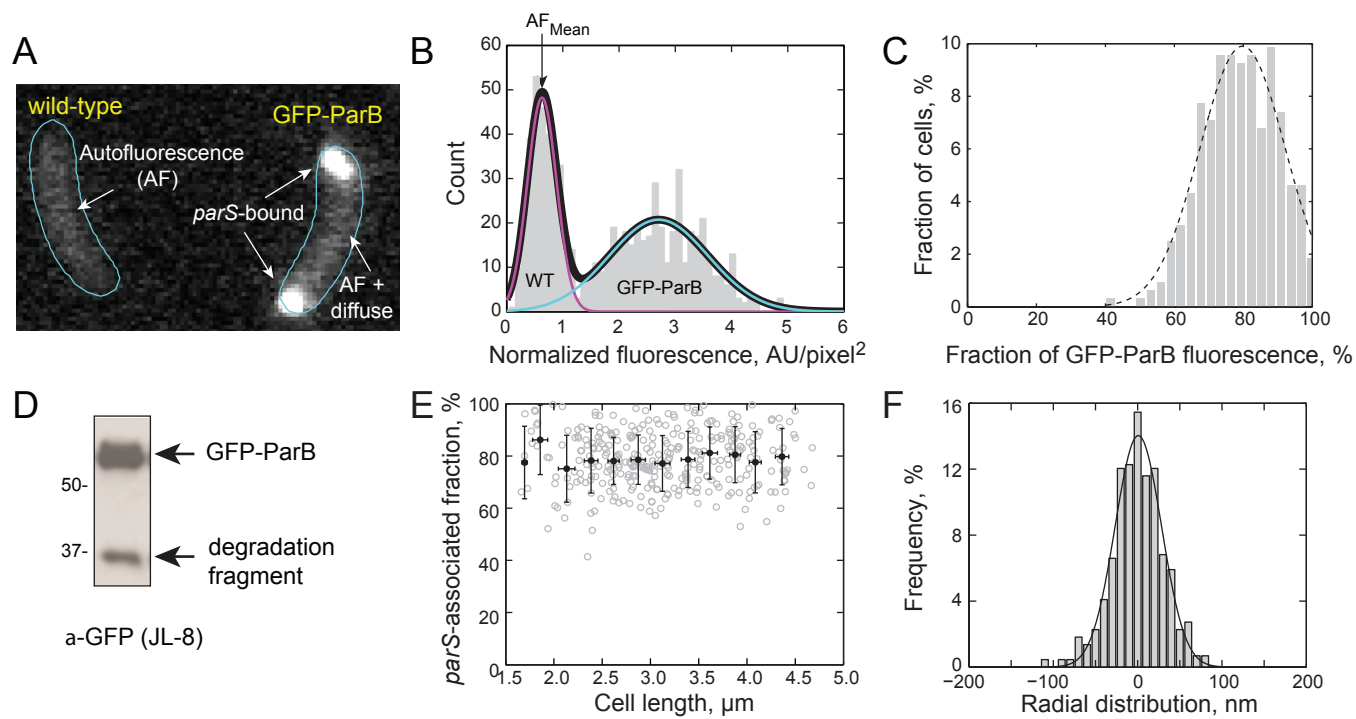

**Figure 1—figure supplement 3**

Supplement: supp [file elife-02758-supp-v1.zip]

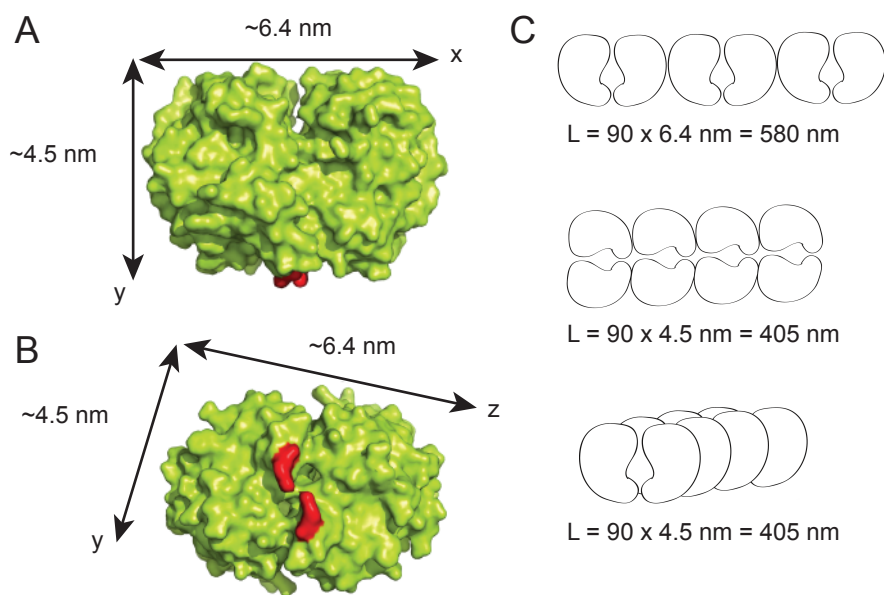

**Figure 1—figure supplement 8**

Supplement: supp [file elife-02758-supp-v1.zip]

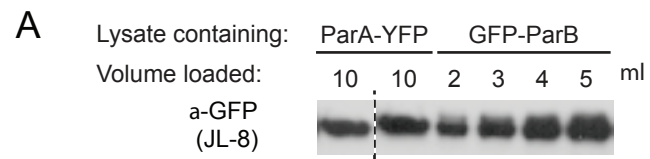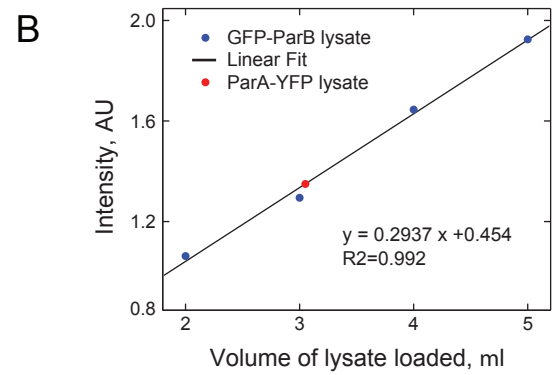

**Figure 1—figure supplement 7**

Supplement: supp [file elife-02758-supp-v1.zip]

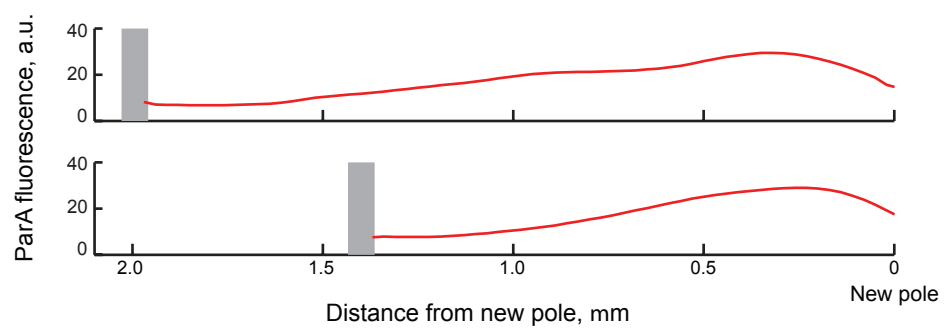

**Figure 4—figure supplement 1**

Supplement: supp [file elife-02758-supp-v1.zip]

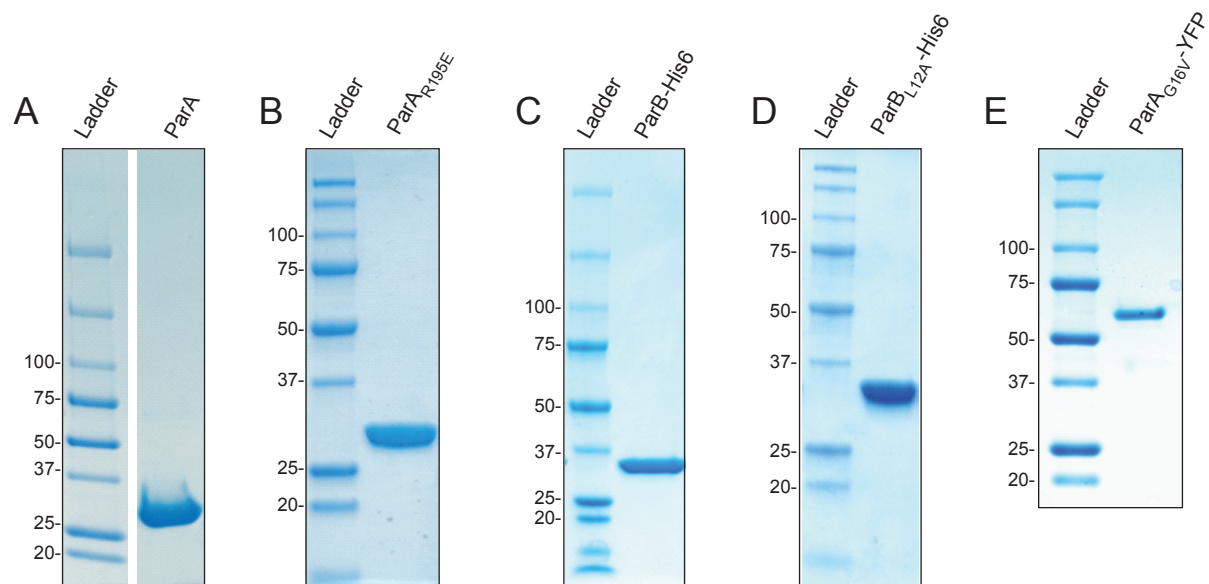

**Figure 1—figure supplement 1**

Supplement: supp [file elife-02758-supp-v1.zip]

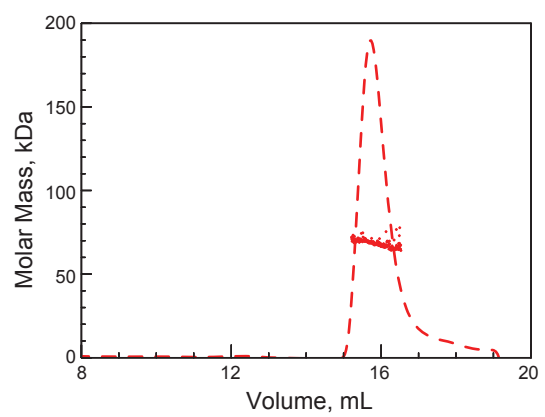

**Figure 1—figure supplement 5**

Supplement: supp [file elife-02758-supp-v1.zip]

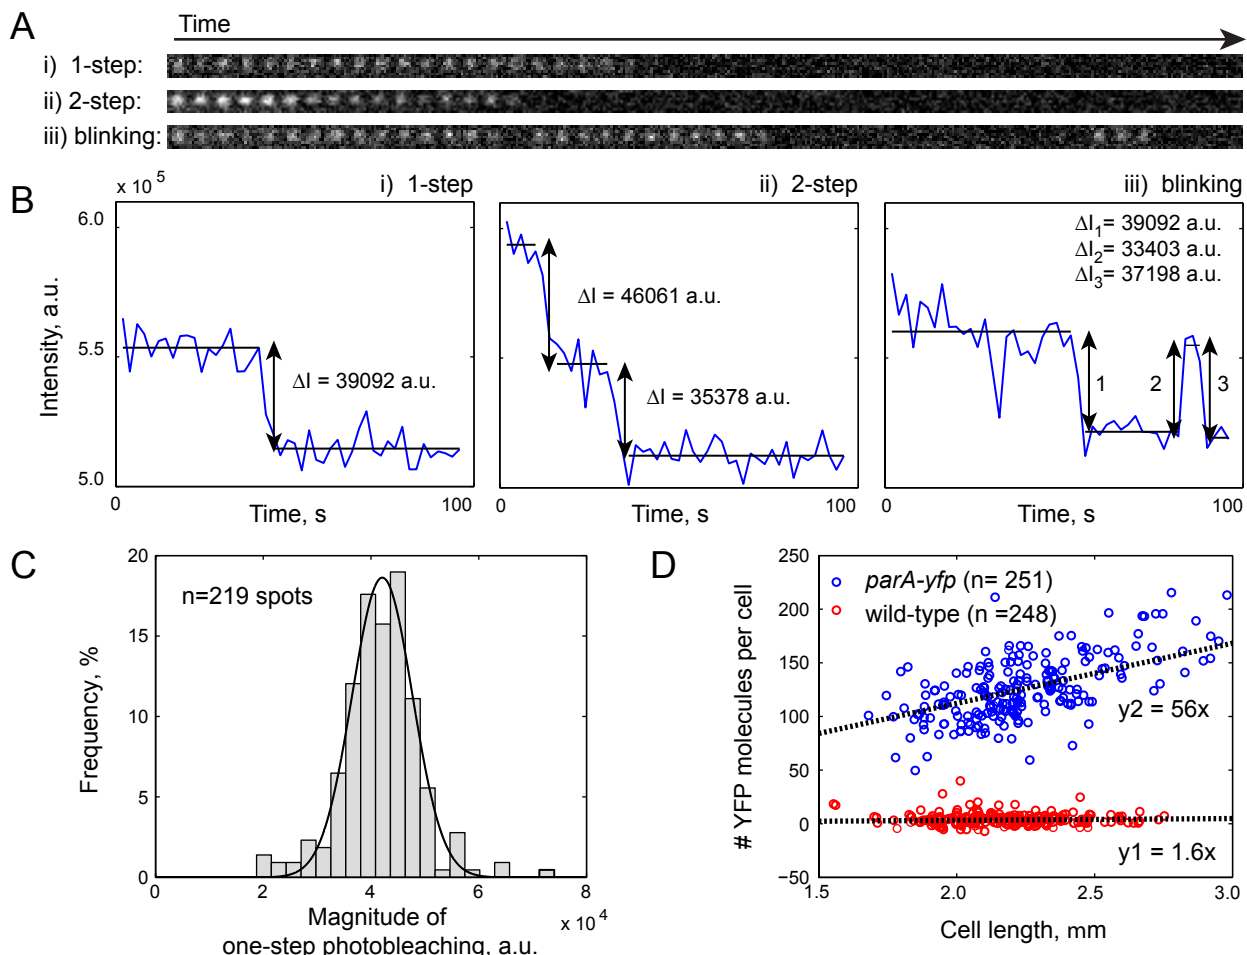

**Figure 1—figure supplement 6**

Supplement: supp [file elife-02758-supp-v1.zip]
